# Supplementary material for: Enzyme triggered disassembly of amphiphilic linear-dendritic block copolymer micelles based on poly[N-(2-hydroxyethyl-l-glutamine)]
Source: Royal Society of Chemistry journal article supplement (doi:10.1039/c8py01231h), 2018-11-14
Supplement: c8py01231h1.pdf [file c8py01231h1.pdf]

## Enzyme triggered disassembly of amphiphilic linear-dendritic block copolymer micelles based on poly[*N*-(2-hydroxyethyl-L-glutamine)]

Yangyang Qian, Dan You, Feng Lin, Junwu Wei, Yujia Wang and Yunmei Bi\*

College of Chemistry and Chemical Engineering, Yunnan Normal University, Kunming 650500, China. E-mail: [yunmeibi@hotmail.com](mailto:yunmeibi@hotmail.com)

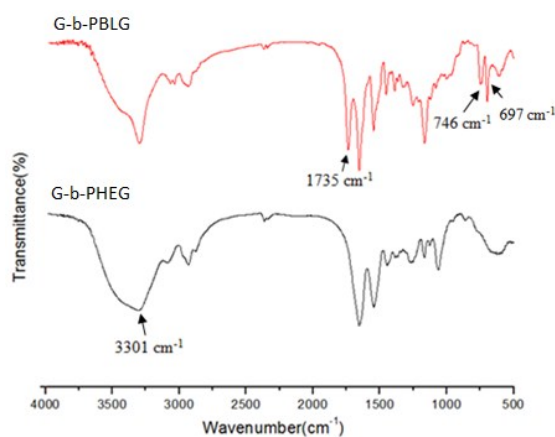

Fig. S1 IR spectra of G-*b*-PBLG and G-*b*-PHEG.

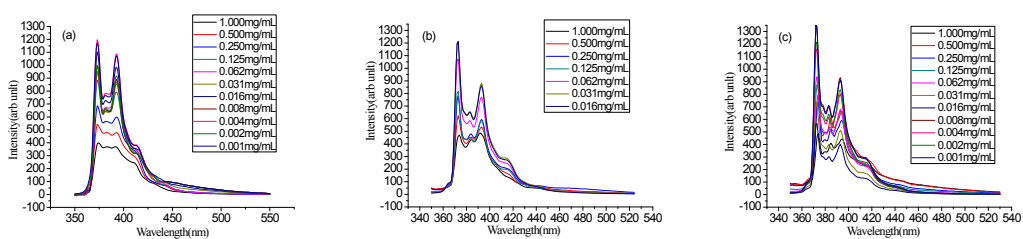

Fig. S2 Fluorescence spectra of pyrene of G-*b*-PHEG(a), bis-MPA-G<sub>1</sub>-*b*-PHEG (b) and bis-MPA-G<sub>2</sub>-*b*-PHEG (c) in water at different concentrations.
